# Supplementary material for: 3-D Visualization and Quantitation of Microvessels in Transparent Human Colorectal Carcinoma
Source: PubMed Central journal article supplement (PMC3843693; doi:10.1371/journal.pone.0081857), 2013-11-29

# Supplemental Figure S2

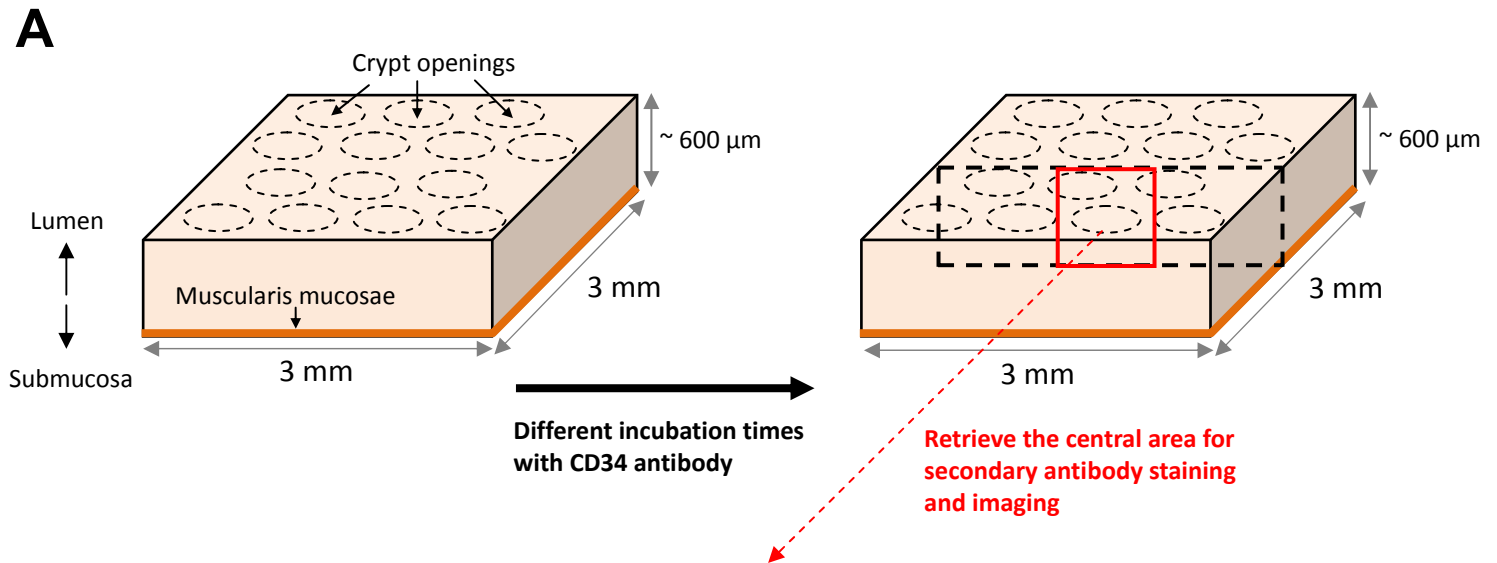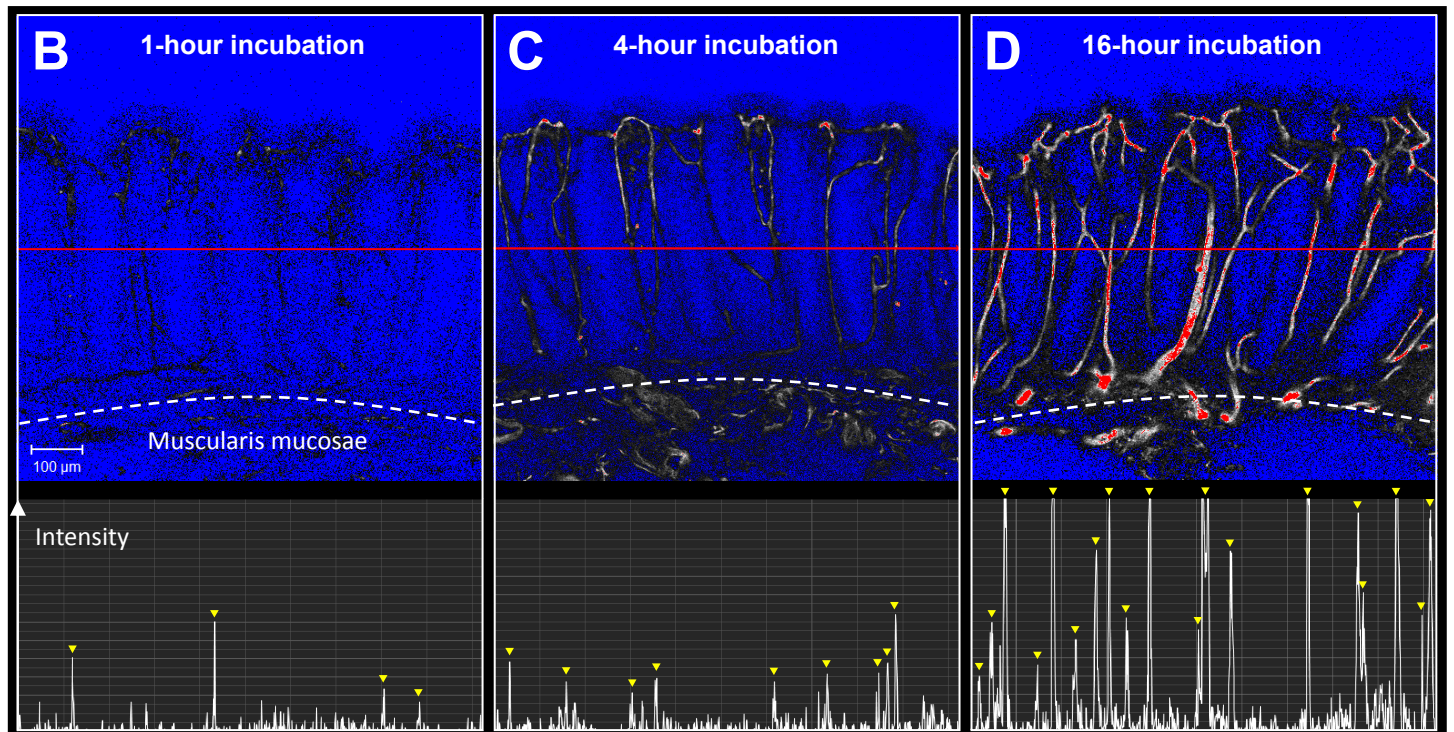

Supplement: pone.0081857.s002.pdf [file pone.0081857.s002.pdf]
